# Supplementary material
Source: publisher figshare collection journal article supplement (https://brill.figshare.com/ndownloader/files/39472675)
Supplement: Supplementary file 1 [file 39472675]

**Factors affecting nest height and ground nesting behaviour in  
Eastern chimpanzees (*Pan troglodytes schweinfurthii*) of the northern  
Democratic Republic of the Congo**

Toni Romani<sup>a,b</sup>, Sandra Tranquilli<sup>c</sup>, Peter Roessingh<sup>d</sup>, Steph B.J. Menken<sup>d</sup>, Roger Mundry<sup>e,f,g</sup>, Marek Konarzewski<sup>a,h</sup> and Thurston C. Hicks<sup>a</sup>

<sup>a</sup>The Faculty of ‘Artes Liberales’, University of Warsaw, Ulica Dobra 72, 00-312 Warsaw, Poland

<sup>b</sup>CyberTracker Italia, 33010 Osoppo, Italy

<sup>c</sup>Little Wildlife Explorers, 82061 Neuried, Germany

<sup>d</sup>Institute for Biodiversity and Ecosystem Dynamics, University of Amsterdam, 1098 XH Amsterdam, The Netherlands

<sup>e</sup>Cognitive Ethology Laboratory, German Primate Center, Leibniz Institute for Primate Research, Kellnerweg 4, 37077 Göttingen, Germany

<sup>f</sup>Department for Primate Cognition, Georg-August-University, 37073 Göttingen, Germany

<sup>g</sup>Leibniz Science Campus Primate Cognition, 37077 Göttingen, Germany

<sup>h</sup>Faculty of Biology, University of Białystok, 15-245 Białystok, Poland

\*Corresponding author; e-mail: t.romani@uw.edu.pl

ORCID iD: Romani: 0000-0001-8098-553X

**Supplementary material**



## References

- Boesch C (1995). Innovation in wild chimpanzees (*Pan troglodytes*). *International Journal of Primatology* 16(1): 1–16.  
<https://doi.org/10.1007/BF02700150>.
- Furuichi T, Inagaki H, Angoue-Ovono S (1997). Population density of chimpanzees and gorillas in the Petit Loango Reserve, Gabon: Employing a new method to distinguish between nests of the two species. *International Journal of Primatology* 18: 1029–1046.
- Furuichi T, Hashimoto C (2000). Ground beds of chimpanzees in the Kalinzu Forest, Uganda. *Pan Africa News* 7(2): 26–28.
- Goodall J (1968). The behaviour of free-living chimpanzees in the Gombe Stream Reserve. *Animal Behaviour Monographs* 1: 161–IN12.
- Grieser JB (1997). *Population size and structure of the ngogo chimpanzee Community in the kibale forest, Uganda and the impact of tourism*. PhD dissertation, University College London.
- Hobaïter C, Klein H, Gruber T (2022). Habitual ground nesting in the Bugoma Forest chimpanzees (*Pan troglodytes sweinfurthii*), Uganda. *BioXiv*. <https://doi.org/10.1101/2022.12.14.520400>.
- Humle T (2003). Culture and variation in wild chimpanzee behavior: A study of three communities in West Africa. PhD dissertation, University of Stirling.
- Koops K, Humle T, Sterck EHM, Matsuzawa T (2007). Ground-nesting by the chimpanzees of the Nimba Mountains, Guinea: Environmentally or socially determined? *American Journal of Primatology*, 69: 407–419. <https://doi.org/10.1002/ajp.20358>.
- Koops K, McGrew WC, de Vries H, Matsuzawa T (2012a). Nest-building by chimpanzees (*Pan troglodytes verus*) at Seringbara, Nimba Mountains: Antipredation, thermoregulation, and antivector hypotheses. *International Journal of Primatology* 33: 356–380. <https://doi.org/10.1007/s10764-012-9585-4>.
- Koops K, McGrew WC, Matsuzawa T, Knapp LA (2012b). Terrestrial nest-building by wild chimpanzees (*Pan troglodytes*): Implications for the tree-to-ground sleep transition in early hominins. *American Journal of Physical Anthropology* 148: 351–361. <https://doi.org/10.1002/ajpa.22056>.
- Lapiente J, Ouattara A, Köster PC, Linsenmair KE (2020). Status and distribution of Comoé chimpanzees: Combined use of transects and camera traps to quantify a low-density population in savanna-forest mosaic. *Primates* 61: 647–659. <https://doi.org/10.1007/s10329-020-00816-3>.
- Morgan D, Sanz C, Onononga J R, Strindberg S (2006). Ape abundance and habitat use in the Goualougo Triangle, Republic of Congo. *International Journal of Primatology* 27(1): 147–179. <https://doi.org/10.1007/s10764-005-9013-0>.
- Nishida T, Kano T, Goodall J, McGrew WC, Nakamura M (1999). Ethogram and ethnography of Mahale chimpanzees. *Anthropological Science* 107: 141–188.
- Pruetz JD, Fulton SJ, Marchant LF, McGrew WC, Schiel M, Waller M (2008). Arboreal nesting as anti-predator adaptation by savanna chimpanzees (*Pan troglodytes verus*) in southeastern Senegal. *American Journal of Primatology* 70: 393–401. <https://doi.org/10.1002/ajp.20508>.
- Reynolds V, Reynolds F (1965). Chimpanzees of the Budongo Forest. In *Primate Behavior – Field Studies of Monkeys and Apes* (De Vore I, ed.), pp. 368–424. New York, Holt, Rinehart and Winston.

- Samson DR, Hunt KD (2014) Chimpanzees preferentially select sleeping platform construction tree species with biomechanical properties that yield stable, firm, but compliant nests. *PLoS ONE* 9(7): e104024. <https://doi.org/10.1371/journal.pone.0095361>.
- Stewart FA (2011b). *The evolution of shelter: Ecology and ethology of chimpanzee nest building*. PhD dissertation. University of Cambridge.
- Ukpong EE, Jacob DE, Ibok PB, Nelson IU (2011). Nest building behaviour of chimpanzee (*Pan Troglodytes blumenbach*) at Filinga Range of Gashaka Gumti National Park, Nigeria. *Journal of Scientific Technology* 3: 7.
- van Dijk K, Cibot M, McLennan MR (2021). Chimpanzees (*Pan troglodytes*) adapt their nesting behavior after large-scale forest clearance and community decline. *American Journal of Primatology* 83(10): e23323. <https://doi.org/10.1002/ajp.23323>.

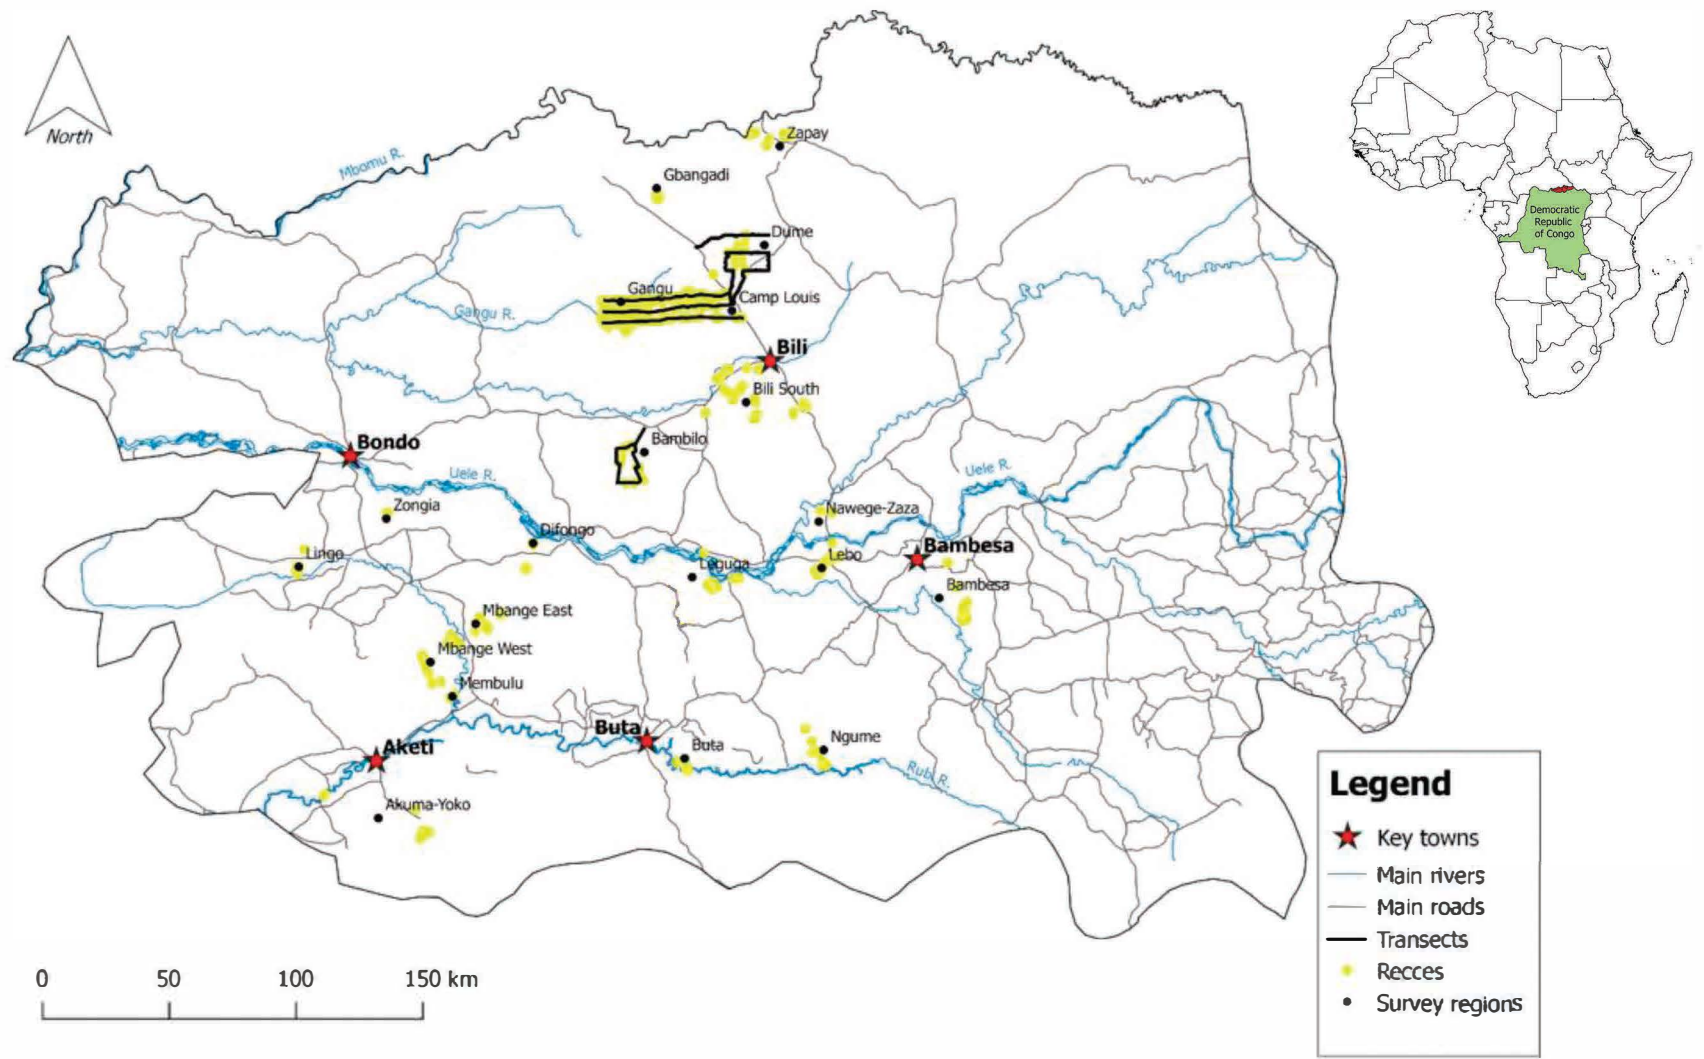

**Figure 1.** Location of the surveyed areas within the Bili-Uere landscape. See supplementary table S2, Hicks *et al.* (2014, 2019a, and 2020) for further details.

**Table S2.** Numbers and ratios of ground nest groups and ground nests found out of total numbers of nest groups and nests in the Bili-Uéré Landscape, DRC.

| Study area           | Time period                                 | Km walked per area | No. GN sites / total no. nest groups | Ratio GN sites / nest groups (%) | No. GN / total no. nests | Ratio GN / nests (%) |
|----------------------|---------------------------------------------|--------------------|--------------------------------------|----------------------------------|--------------------------|----------------------|
| Camp Louis total     | Aug 04–Jul 05, Aug 06–Feb 07, Jul 12–Mar 13 | 1,421.6            | 59 / 303                             | 19.5                             | 86 / 739                 | 11.6                 |
| Camp Louis transects | March–July 05, Aug–Sept 12                  | 114.5              | 24 / 146                             | 16.4                             | 37 / 317                 | 11.7                 |
| Camp Louis recces    | Aug 04–Jul 05, Aug 06–Feb 07, Jul 12–Mar 13 | 1,307.1            | 35 / 157                             | 22.3                             | 49 / 422                 | 11.6                 |
| Gangu total          | Mar 05–Jun 05, Aug 06–Feb 07, Jul 12–Mar 13 | 949.4              | 60 / 393                             | 14.9                             | 119 / 934                | 12.7                 |
| Gangu transects      | March–July 05, Aug–Sept 12                  | 71.5               | 23 / 144                             | 16.0                             | 41 / 390                 | 10.5                 |
| Gangu recces         | Mar 05–Jun 05, Aug 06–Feb 07, Jul 12–Mar 13 | 877.9              | 37 / 249                             | 15.3                             | 78 / 544                 | 14.3                 |
| Bili South           | Jul 06–Nov 06                               | 205.0              | 4 / 58                               | 6.9                              | 6 / 115                  | 5.2                  |
| Zapay                | Dec 06                                      | 49.9               | 8 / 68                               | 11.8                             | 10 / 128                 | 7.8                  |
| Gbangadi             | Dec 06                                      | 31.7               | 3 / 32                               | 9.4                              | 3 / 98                   | 3.1                  |
| Nawege-Zaza          | Sept 06, Aug 08                             | 21.7               | 0 / 11                               | 0.0                              | 0 / 32                   | 0.0                  |
| Dume total           | Aug–Sept 12                                 | 102.6              | 2 / 13                               | 15.4                             | 6 / 26                   | 23.1                 |
| Dume transects       | Aug–Sept 12                                 | 27.0               | 0 / 4                                | 0.0                              | 0 / 6                    | 0.0                  |
| Dume recces          | Aug–Sept 12                                 | 75.6               | 2 / 9                                | 22.2                             | 6 / 20                   | 30.0                 |
| Bambilo total        | Oct 12                                      | 76.2               | 1 / 23                               | 4.3                              | 1 / 55                   | 1.8                  |
| Bambilo transects    | Oct 12                                      | 18.0               | 0 / 6                                | 0.0                              | 0 / 11                   | 0.0                  |
| Bambilo recces       | Oct 12                                      | 58.2               | 1 / 17                               | 5.9                              | 1 / 44                   | 2.3                  |
| N Uele Total         | Aug 04–Mar 13                               | 2,858.1            | 137 / 901                            | 15.2                             | 231 / 2,127              | 10.9                 |
| Leguga               | Mar 08                                      | 48.5               | 19 / 48                              | 39.6                             | 33 / 115                 | 28.7                 |
| Buta                 | Sept 08                                     | 25.6               | 0 / 15                               | 0.0                              | 0 / 27                   | 0.0                  |
| Ngume                | Sept–Oct 08                                 | 37.5               | 0 / 16                               | 0.0                              | 0 / 28                   | 0.0                  |
| Akuma - Yoko         | Jun 08, Nov 08                              | 22.4               | 2 / 21                               | 9.5                              | 2 / 37                   | 5.4                  |
| Mbange E             | Jan 08                                      | 80.9               | 1 / 47                               | 2.1                              | 1 / 92                   | 1.1                  |
| Mbange W             | Jan 08–Feb 08                               | 45.5               | 0 / 32                               | 0.0                              | 0 / 69                   | 0.0                  |
| Lingo                | Nov 07                                      | 38.5               | 0 / 24                               | 0.0                              | 0 / 40                   | 0.0                  |
| Zongia               | Nov 07                                      | 35.7               | 2 / 18                               | 11.1                             | 3 / 31                   | 9.7                  |
| Difongo              | Feb 09                                      | 33.8               | 3 / 5                                | 60.0                             | 3 / 23                   | 13.0                 |
| Membulu              | Feb 09                                      | 2.0                | 1 / 3                                | 33.3                             | 1 / 18                   | 5.6                  |
| Lebo                 | Sept 06, Aug 08                             | 41.3               | 3 / 69                               | 4.4                              | 3 / 166                  | 1.8                  |
| Bambesa              | April–May 08                                | 65.0               | 11 / 78                              | 14.1                             | 34 / 218                 | 15.6                 |
| S of Uele Total      | Sept 06–Mar 13                              | 476.7              | 42 / 376                             | 11.2                             | 80 / 864                 | 9.3                  |
| Total                | Aug 04–Mar 13                               | 3,334.8            | 179 / 1,277                          | 14.0                             | 311 / 2,991              | 10.4                 |

Km in Dume and Camp Louis are slightly different from Hicks *et al.* (2019a) as we have reclassified 9.03 km of the Nambala recces from Camp Louis to Dume. The number of nests differs from those in table 4 and other supplementary materials because here we omit nests which were found by locals and to which we were led (see supplementary table S7 for more details on number of nests per nest group).

TH was not present for the surveys of Bambilo, Dume, Membulu, and Difongo, but the teams were led by experienced researchers who had trained with TH, and thus we have used the nest encounter rates from these areas in the paper.

GN, ground nest.

**Table S3.** Numbers and encounter rates per km (in bold) of carnivores, large herbivores (elephant and buffalo), human (non-hunting) signs and human hunting evidence.

| Site         | Km walked fauna      | Carnivore signs (No. & / km) | Lion signs (No. & / km) | Hyena signs (No. & / km) | Leopard signs (No. & / km) | Elephant signs (No. & / km) | Buffalo signs (No. & / km) | Km walked humans | Hunting evidence (No. & / km) | Other signs humans (No. & / km) |
|--------------|----------------------|------------------------------|-------------------------|--------------------------|----------------------------|-----------------------------|----------------------------|------------------|-------------------------------|---------------------------------|
| Camp Louis   | 1,421.6 <sup>1</sup> | 41<br><b>0.03</b>            | 1<br><b>0.001</b>       | 18<br><b>0.01</b>        | 22<br><b>0.02</b>          | 236<br><b>0.17</b>          | 34<br><b>0.16</b>          | 1,120.2          | 16<br><b>0.01</b>             | 116<br><b>0.10</b>              |
| Gangu        | 948.5 <sup>1</sup>   | 31<br><b>0.03</b>            | 1<br><b>0.001</b>       | 8<br><b>0.01</b>         | 22<br><b>0.02</b>          | 1,037<br><b>1.09</b>        | 31<br><b>0.05</b>          | 940.0            | 36<br><b>0.04</b>             | 127<br><b>0.14</b>              |
| Bili South   | 205.0                | 6<br><b>0.03</b>             | 0<br><b>0.00</b>        | 1<br><b>0.005</b>        | 5<br><b>0.02</b>           | 23<br><b>0.11</b>           | 20<br><b>0.10</b>          | 87.6             | 29<br><b>0.33</b>             | 104<br><b>1.19</b>              |
| Zapay        | 49.9                 | 4<br><b>0.08</b>             | 0<br><b>0.00</b>        | 4<br><b>0.08</b>         | 0<br><b>0.00</b>           | 0<br><b>0.00</b>            | 6<br><b>0.12</b>           | 49.9             | 9<br><b>0.18</b>              | 19<br><b>0.38</b>               |
| Gbangadi     | 31.7                 | 4<br><b>0.13</b>             | 0<br><b>0.00</b>        | 0<br><b>0.00</b>         | 4<br><b>0.13</b>           | 2<br><b>0.06</b>            | 0<br><b>0.00</b>           | 31.7             | 0<br><b>0.00</b>              | 19<br><b>0.60</b>               |
| Nawege-Zaza  | 21.7                 | 0<br><b>0.00</b>             | 0<br><b>0.00</b>        | 0<br><b>0.00</b>         | 0<br><b>0.00</b>           | 2<br><b>0.09</b>            | 1<br><b>0.05</b>           | 21.7             | 1<br><b>0.05</b>              | 6<br><b>0.28</b>                |
| Dume         | 102.6                | 2<br><b>0.02</b>             | 0<br><b>0.00</b>        | 1<br><b>0.01</b>         | 1<br><b>0.01</b>           | 16<br><b>0.16</b>           | 4<br><b>0.04</b>           | 102.6            | 32<br><b>0.31</b>             | 56<br><b>0.55</b>               |
| Bambilo      | 76.2                 | 2<br><b>0.03</b>             | 0<br><b>0.00</b>        | 0<br><b>0.00</b>         | 2<br><b>0.03</b>           | 29<br><b>0.38</b>           | 3<br><b>0.04</b>           | 77.7             | 29<br><b>0.37</b>             | 42<br><b>0.54</b>               |
| N Uele total | 2,990.0              | 90<br><b>0.03</b>            | 2<br><b>0.001</b>       | 32<br><b>0.01</b>        | 56<br><b>0.02</b>          | 1,345<br><b>0.45</b>        | 99<br><b>0.03</b>          | 2,440.6          | 151<br><b>0.06</b>            | 464<br><b>0.19</b>              |
| Leguga       | 48.5                 | 0<br><b>0.00</b>             | 0<br><b>0.00</b>        | 0<br><b>0.00</b>         | 0<br><b>0.00</b>           | 0<br><b>0.00</b>            | 2<br><b>0.04</b>           | 48.5             | 13<br><b>0.27</b>             | 124<br><b>0.29</b>              |
| Buta         | 25.6                 | 0<br><b>0.00</b>             | 0<br><b>0.00</b>        | 0<br><b>0.00</b>         | 0<br><b>0.00</b>           | 0<br><b>0.00</b>            | 0<br><b>0.00</b>           | 25.6             | 4<br><b>0.16</b>              | 14<br><b>0.55</b>               |
| Ngume        | 39.4                 | 4<br><b>0.10</b>             | 0<br><b>0.00</b>        | 0<br><b>0.00</b>         | 4<br><b>0.10</b>           | 1<br><b>0.03</b>            | 0<br><b>0.00</b>           | 39.4             | 6<br><b>0.79</b>              | 28<br><b>0.71</b>               |
| Akuma-Yoko   | 24.5                 | 0<br><b>0.00</b>             | 0<br><b>0.00</b>        | 0<br><b>0.00</b>         | 0<br><b>0.00</b>           | 1<br><b>0.04</b>            | 0<br><b>0.00</b>           | 23.5             | 29<br><b>1.23</b>             | 17<br><b>0.72</b>               |
| Mbange East  | 80.9                 | 2<br><b>0.03</b>             | 0<br><b>0.00</b>        | 0<br><b>0.00</b>         | 2<br><b>0.03</b>           | 42<br><b>0.52</b>           | 0<br><b>0.00</b>           | 80.9             | 10<br><b>0.12</b>             | 8<br><b>0.10</b>                |
| Mbange West  | 45.5                 | 0                            | 0                       | 0                        | 0                          | 7                           | 1                          | 45.5             | 38                            | 128                             |

**0.00      0.00      0.00      0.00      0.15      0.02      0.84      2.81**

Continued from table S3.

| Site            | Km walked<br>fauna | Carnivore<br>signs<br>(No. &<br>/ km) | Lion<br>signs<br>(No. & /<br>km) | Hyena<br>signs<br>(No. & /<br>km) | Leopard<br>signs (No.<br>&<br>/ km) | Elephant<br>signs (No.<br>&<br>/ km) | Buffalo<br>signs (No.<br>&<br>/ km) | Km<br>walked<br>humans | Hunting<br>evidence<br>(No. &<br>/ km) | Other signs<br>humans<br>(No. &<br>/ km) |
|-----------------|--------------------|---------------------------------------|----------------------------------|-----------------------------------|-------------------------------------|--------------------------------------|-------------------------------------|------------------------|----------------------------------------|------------------------------------------|
| Lingo           | 38.5               | 0<br><b>0.00</b>                      | 0<br><b>0.00</b>                 | 0<br><b>0.00</b>                  | 0<br><b>0.00</b>                    | 2<br><b>0.05</b>                     | 0<br><b>0.00</b>                    | 38.5                   | 106<br><b>2.75</b>                     | 72<br><b>1.87</b>                        |
| Zongia          | 35.7               | 1<br><b>0.03</b>                      | 0<br><b>0.00</b>                 | 0<br><b>0.00</b>                  | 1<br><b>0.03</b>                    | 8<br><b>0.22</b>                     | 0<br><b>0.00</b>                    | 35.7                   | 15<br><b>0.42</b>                      | 21<br><b>0.59</b>                        |
| Lebo            | 41.3               | 2<br><b>0.05</b>                      | 0<br><b>0.00</b>                 | 0<br><b>0.00</b>                  | 2<br><b>0.05</b>                    | 1<br><b>0.02</b>                     | 1<br><b>0.02</b>                    | 31.0                   | 31<br><b>1.00</b>                      | 92<br><b>2.97</b>                        |
| Bambesa         | 65.0               | 5<br><b>0.08</b>                      | 0<br><b>0.00</b>                 | 0<br><b>0.00</b>                  | 5<br><b>0.08</b>                    | 26<br><b>0.40</b>                    | 0<br><b>0.00</b>                    | 65.0                   | 11<br><b>0.17</b>                      | 25<br><b>0.39</b>                        |
| S Uele<br>total | 444.4              | 14<br><b>0.03</b>                     | 0<br><b>0.00</b>                 | 0<br><b>0.00</b>                  | 14<br><b>0.03</b>                   | 88<br><b>0.20</b>                    | 4<br><b>0.01</b>                    | 433.6                  | 263<br><b>0.61</b>                     | 529<br><b>1.22</b>                       |
| Total           | 3,434.4            | 104<br><b>0.03</b>                    | 2<br><b>0.001</b>                | 32<br><b>0.01</b>                 | 70<br><b>0.02</b>                   | 1,433<br><b>0.42</b>                 | 103<br><b>0.03</b>                  | 2,874.2                | 414<br><b>0.14</b>                     | 993<br><b>0.35</b>                       |

<sup>1</sup>km used for the buffalo encounter rates in Camp Louis (208.5 km) and Gangu (612.6 km) differ because we include here only the 2012 data (see Hicks [2014] for details).

Note: Elephant recce encounter rates include one contact with an elephant in Camp Louis. Leopard (transect) and hyena (recce) data for Gangu also each include one contact. The buffalo sign at Mbange West was the carcass of an adult that had been killed by a Nile crocodile.

## Reference

Hicks TC (2014). Faunal diversity and human impact in two protected areas of northern DR Congo: Bili-Uéré and Rubi-Télé. Lukuru Foundation, USFWS Final Report 169.



**Table S4.** Nest occurrence and percentages (in bold) in the different habitat types. See table 2 for definitions of the habitat types.

|            |           | Active field | Old field /<br>Regenerating forest | Secondary forest | Mixed forest | Riparian forest | Swamp forest | <i>Gilbertiodendron</i> monodominant | Savanna forest | Total |
|------------|-----------|--------------|------------------------------------|------------------|--------------|-----------------|--------------|--------------------------------------|----------------|-------|
| North Uele | All nests | 0            | 47                                 | 3                | 1094         | 512             | 247          | 117                                  | 10             | 2,030 |
|            |           | <b>0</b>     | <b>2.3</b>                         | <b>0.2</b>       | <b>53.9</b>  | <b>25.2</b>     | <b>12.2</b>  | <b>5.8</b>                           | <b>0.5</b>     | –     |
|            | TNs       | 0            | 47                                 | 2                | 972          | 466             | 247          | 115                                  | 8              | 1,857 |
|            |           | <b>0</b>     | <b>2.5</b>                         | <b>0.1</b>       | <b>52.3</b>  | <b>25.1</b>     | <b>13.3</b>  | <b>6.2</b>                           | <b>0.4</b>     | –     |
|            | GNs       | 0            | 0                                  | 1                | 122          | 46              | 0            | 2                                    | 2              | 173   |
|            |           | <b>0</b>     | <b>0</b>                           | <b>0.6</b>       | <b>70.5</b>  | <b>26.6</b>     | <b>0</b>     | <b>1.2</b>                           | <b>1.2</b>     | –     |
| South Uele | All nests | 11           | 0                                  | 0                | 355          | 52              | 52           | 419                                  | 0              | 889   |
|            |           | <b>1.2</b>   | <b>0</b>                           | <b>0</b>         | <b>39.9</b>  | <b>5.9</b>      | <b>5.9</b>   | <b>47.1</b>                          | <b>0</b>       | –     |
|            | TNs       | 11           | 0                                  | 0                | 293          | 51              | 19           | 396                                  | 0              | 770   |
|            |           | <b>1.4</b>   | <b>0</b>                           | <b>0</b>         | <b>38.1</b>  | <b>6.6</b>      | <b>2.5</b>   | <b>51.4</b>                          | <b>0</b>       | –     |
|            | GNs       | 0            | 0                                  | 0                | 62           | 1               | 33           | 23                                   | 0              | 119   |
|            |           | <b>0</b>     | <b>0</b>                           | <b>0</b>         | <b>52.1</b>  | <b>0.8</b>      | <b>27.7</b>  | <b>19.3</b>                          | <b>0</b>       | –     |
| Total      | All nests | 11           | 47                                 | 3                | 1,449        | 564             | 299          | 536                                  | 10             | 2,919 |
|            |           | <b>0.4</b>   | <b>1.6</b>                         | <b>0.1</b>       | <b>49.6</b>  | <b>19.3</b>     | <b>10.2</b>  | <b>18.4</b>                          | <b>0.3</b>     | –     |
|            | TNs       | 11           | 47                                 | 2                | 1,265        | 517             | 266          | 511                                  | 8              | 2,627 |
|            |           | <b>0.4</b>   | <b>1.8</b>                         | <b>0.001</b>     | <b>48.2</b>  | <b>19.7</b>     | <b>10.1</b>  | <b>19.5</b>                          | <b>0.3</b>     | -     |
|            | GNs       | 0            | 0                                  | 1                | 184          | 47              | 33           | 25                                   | 2              | 292   |
|            |           | <b>0</b>     | <b>0</b>                           | <b>0.3</b>       | <b>63.0</b>  | <b>16.1</b>     | <b>11.3</b>  | <b>8.6</b>                           | <b>0.7</b>     | –     |

We included here only those nests for which we had collected information on habitat.

GNs, ground nests; TNs, tree nests.



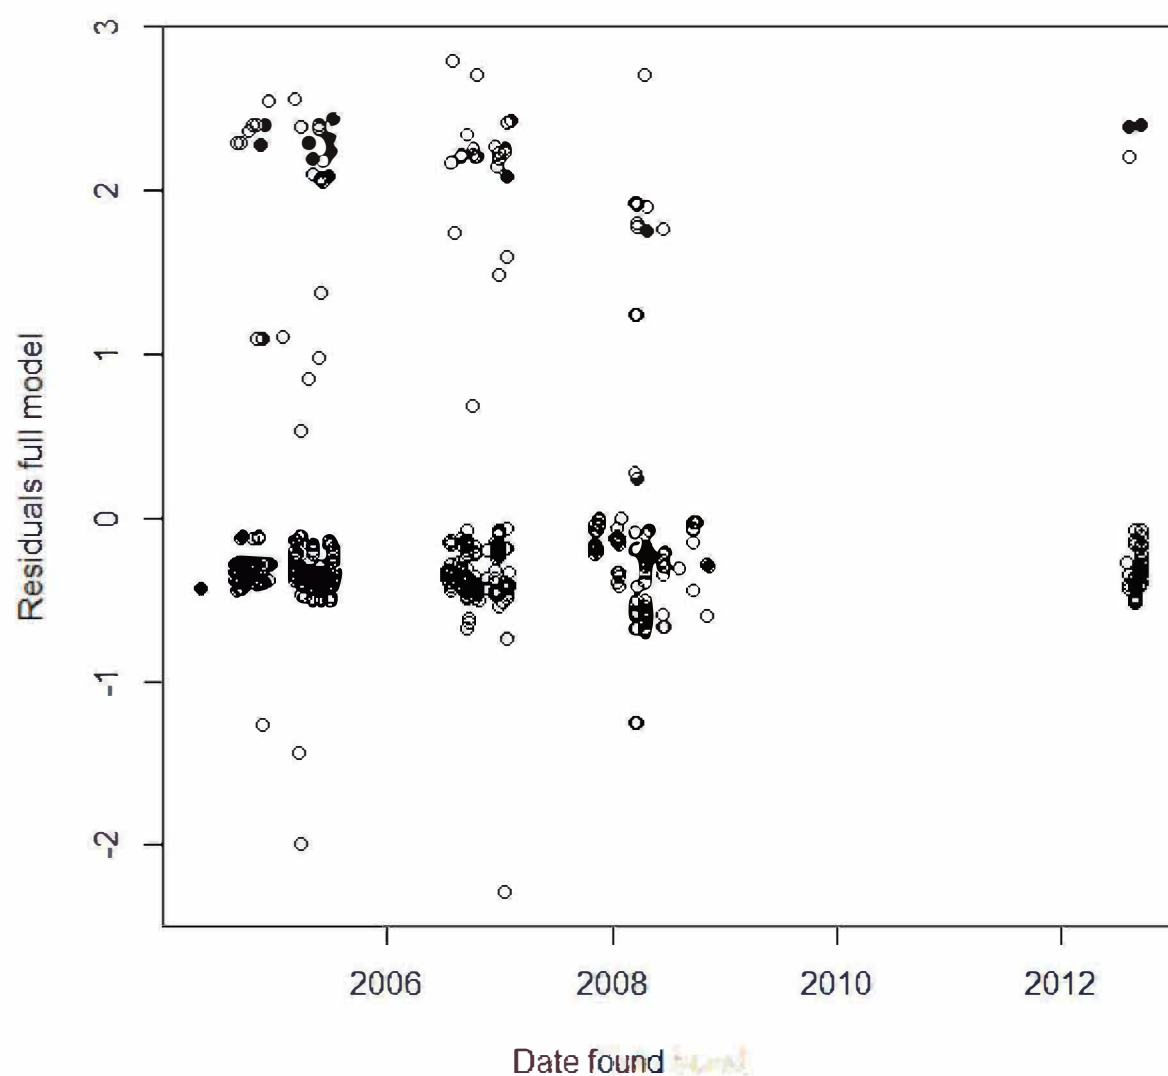

**Figure S2.** Model 1a: Residuals of the full model as a function of date. Note that there is no clustering in the residuals such that larger values concentrate in some periods and smaller values in others (as would be expected if ground nest building would be particularly common during some parts of the year).

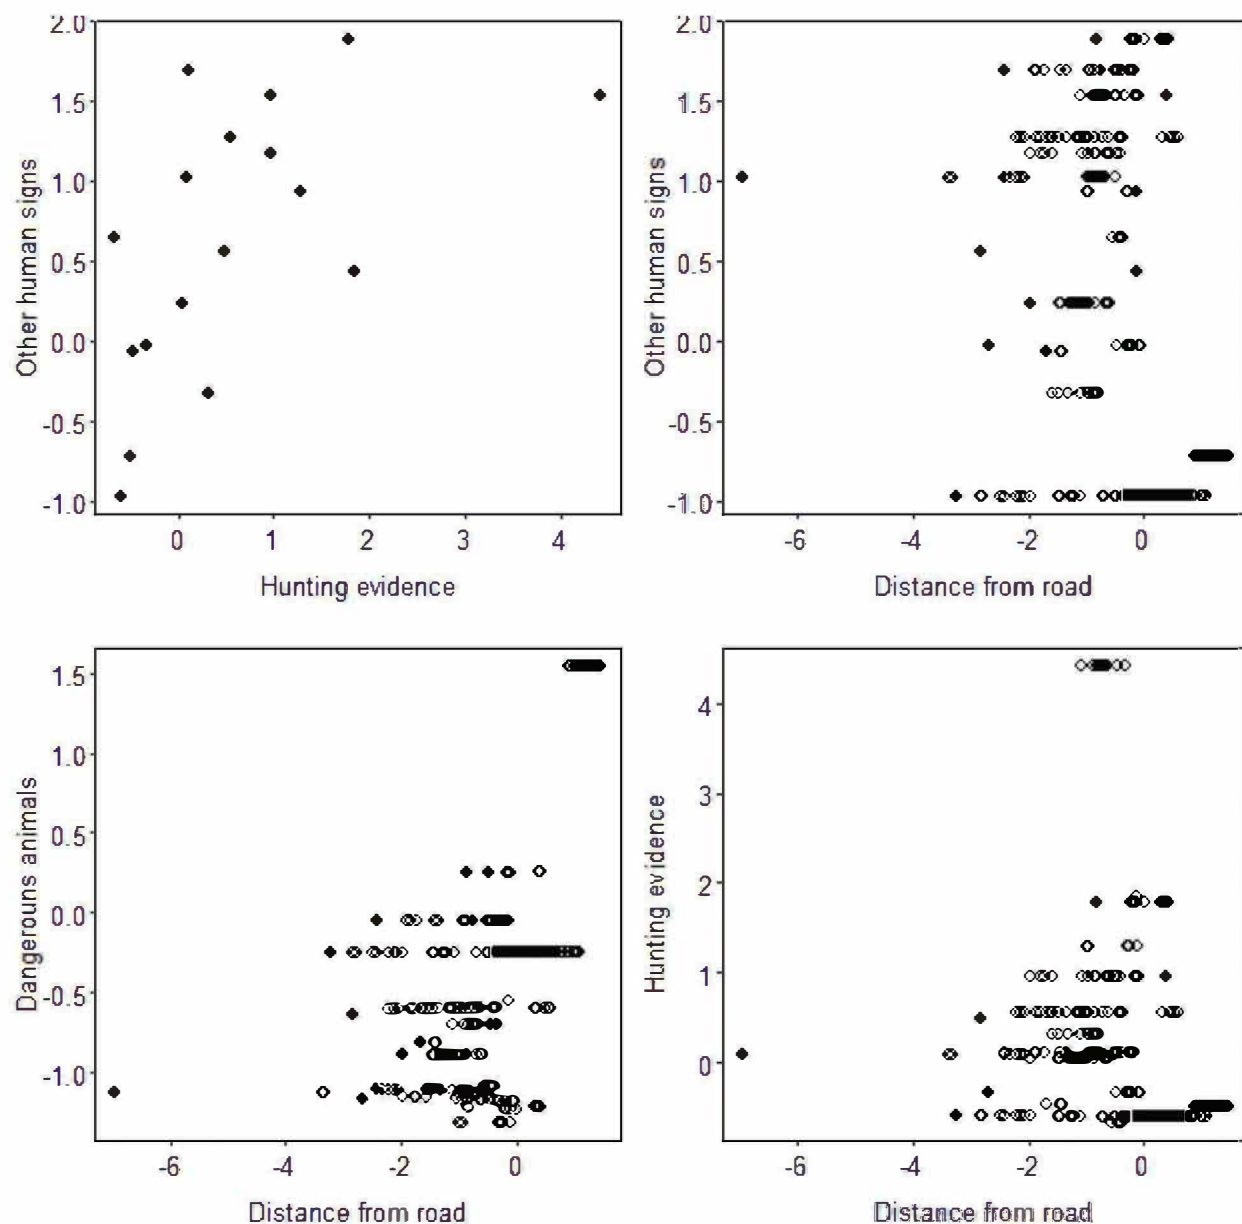

**Figure S3.** Scatterplots used in Model 1a to check for collinearity between hunting evidence and other human signs, distance from road and dangerous animals and/ or hunting evidence and other human signs.

**Table S6.** Model 1: Results of the models excluding (a) hunting evidence and (b) other human signs and (c) with combination of, respectively, human (hunting signs and otherwise) and dangerous animals (predators and large herbivores) signs (Model 1b).

(a)

| Term                 | est    | SE    | $\chi^2$ <sup>a</sup> | P              |
|----------------------|--------|-------|-----------------------|----------------|
| (Intercept)          | -2.938 | 0.166 | —                     | —              |
| Hillside             | -1.143 | 1.025 | -1.115                | 0.265          |
| Herb patch           | 2.159  | 0.465 | 4.644                 | < <b>0.001</b> |
| Light gap            | 2.619  | 0.583 | 4.491                 | < <b>0.001</b> |
| Forest density       | 0.352  | 0.124 | 2.846                 | <b>0.004</b>   |
| Distance from road   | 0.295  | 0.266 | 1.107                 | 0.268          |
| Other signs (humans) | -0.566 | 0.202 | -2.796                | <b>0.005</b>   |
| Carnivores           | -0.037 | 0.168 | -0.218                | 0.827          |
| Large herbivores     | -0.081 | 0.222 | -0.365                | 0.715          |

(b)

| Term               | est    | SE    | $\chi^2$ <sup>a</sup> | P              |
|--------------------|--------|-------|-----------------------|----------------|
| (Intercept)        | -3.146 | 0.207 | —                     | —              |
| Hillside           | -1.045 | 1.027 | -1.017                | 0.309          |
| Herb patch         | 2.304  | 0.496 | 4.643                 | < <b>0.001</b> |
| Light gap          | 2.561  | 0.598 | 4.287                 | < <b>0.001</b> |
| Forest density     | 0.358  | 0.124 | 2.888                 | <b>0.004</b>   |
| Distance from road | 0.257  | 0.257 | 0.999                 | 0.318          |
| Hunting evidence   | -1.248 | 0.376 | -3.319                | <b>0.001</b>   |
| Carnivores         | -0.216 | 0.163 | -1.324                | 0.186          |
| Large herbivores   | -0.084 | 0.219 | -0.385                | 0.700          |

(c)

| Term                            | est    | SE    | $\chi^2$ <sup>a</sup> | P              |
|---------------------------------|--------|-------|-----------------------|----------------|
| (Intercept)                     | -2.949 | 0.167 | —                     | —              |
| Hillside                        | -1.104 | 1.026 | -1.076                | 0.282          |
| Herb patch                      | 2.218  | 0.464 | 4.783                 | < <b>0.001</b> |
| Light gap                       | 2.581  | 0.585 | 4.413                 | < <b>0.001</b> |
| Forest density <sup>1</sup>     | 0.354  | 0.123 | 2.881                 | <b>0.004</b>   |
| Distance from road <sup>2</sup> | 0.293  | 0.261 | 1.122                 | 0.262          |
| Humans <sup>3</sup>             | -0.594 | 0.193 | -3.075                | <b>0.002</b>   |
| Dangerous animals <sup>4</sup>  | -0.082 | 0.215 | -0.383                | 0.702          |

<sup>a</sup>  $\chi^2$  values from a likelihood ratio test. df was 1 in all cases.

<sup>1</sup> z-transformed to a mean of 0 and a standard deviation of 1; mean and sd of the original variable were 2.01 and 0.59, respectively.

<sup>2</sup> Log and z-transformed to a mean of 0 and a standard deviation of 1; mean and sd of the logged variable were 2.28 and 0.99, respectively.

<sup>3</sup> Log and z-transformed to a mean of 0 and a standard deviation of 1; mean and sd of the logged variable were -0.96 and 1.16, respectively.

<sup>4</sup> Log and z-transformed to a mean of 0 and a standard deviation of 1; mean and sd of the logged variable were 0.38 and 0.26, respectively.

**Table S7.** Number of tree nests and ground nests per nest groups in the surveyed forest areas (see supplementary table S2 for more details on the surveys).

| Survey area | No. nest groups | No. nests | No. GNs | No. nest groups w GNs | No. lone GNs | No. lone TNs | No. GN groups w at least 1 TN | No. nest groups w $\geq 1$ GN, no TNs | No. nest groups w $\geq 5$ GN |
|-------------|-----------------|-----------|---------|-----------------------|--------------|--------------|-------------------------------|---------------------------------------|-------------------------------|
| Camp Louis  | 303             | 739       | 86      | 59                    | 20           | 126          | 29                            | 27                                    | 1                             |
| Gangu       | 393             | 934       | 119     | 60                    | 19           | 194          | 26                            | 15                                    | 4                             |
| Bili South  | 58              | 115       | 6       | 4                     | 1            | 28           | 1                             | 2                                     | 0                             |
| Zapay       | 68              | 128       | 10      | 8                     | 3            | 33           | 4                             | 4                                     | 0                             |
| Gbangadi    | 32              | 98        | 3       | 3                     | 1            | 12           | 2                             | 1                                     | 0                             |
| Nawege-Zaza | 11              | 32        | 0       | 0                     | 0            | 7            | 0                             | 0                                     | 0                             |
| Dume        | 13              | 26        | 6       | 2                     | 1            | 7            | 0                             | 2                                     | 1                             |
| Bambilo     | 23              | 55        | 1       | 1                     | 0            | 13           | 1                             | 0                                     | 0                             |
| Tot N Uele  | 901             | 2,127     | 231     | 137                   | 45           | 420          | 63                            | 51                                    | 6                             |
| Leguga      | 48              | 115       | 33      | 19                    | 6            | 17           | 6                             | 13                                    | 0                             |
| Buta        | 15              | 27        | 0       | 0                     | 0            | 11           | 0                             | 0                                     | 0                             |
| Ngume       | 16              | 28        | 0       | 0                     | 0            | 10           | 0                             | 0                                     | 0                             |
| Akuma-Yoko  | 21              | 37        | 2       | 2                     | 1            | 11           | 1                             | 1                                     | 0                             |
| Mbange East | 47              | 92        | 1       | 1                     | 0            | 27           | 1                             | 0                                     | 0                             |
| Mbange West | 32              | 69        | 0       | 0                     | 0            | 13           | 0                             | 0                                     | 0                             |
| Lingo       | 24              | 40        | 0       | 0                     | 0            | 17           | 0                             | 0                                     | 0                             |
| Zongia      | 18              | 31        | 3       | 2                     | 0            | 11           | 2                             | 0                                     | 0                             |
| Difongo     | 5               | 23        | 3       | 3                     | 2            | 0            | 1                             | 0                                     | 0                             |
| Membulu     | 3               | 18        | 1       | 1                     | 0            | 0            | 1                             | 0                                     | 0                             |
| Lebo        | 69              | 166       | 3       | 3                     | 1            | 35           | 2                             | 1                                     | 0                             |
| Bambesa     | 78              | 218       | 34      | 11                    | 2            | 41           | 9                             | 1                                     | 2                             |
| Tot S Uele  | 376             | 864       | 80      | 42                    | 12           | 193          | 23                            | 16                                    | 2                             |
| Total       | 1,277           | 2,991     | 311     | 179                   | 57           | 613          | 86                            | 67                                    | 8                             |

GNs, ground nests; TNs, tree nests

Table S8. Numbers of ground nests per nest group.

|                                   | Number | %  |
|-----------------------------------|--------|----|
| Total nest groups                 | 1,277  | –  |
| GN groups                         | 179    | 14 |
| GN groups without TNs             | 93     | 52 |
| GN groups with only 1 GN          | 114    | 64 |
| GN groups with 2 or more GNs      | 65     | 36 |
| GN groups with 3 or more GNs      | 24     | 13 |
| GN groups with 4 or more GNs      | 13     | 7  |
| GN groups with 5 or more GNs      | 8      | 5  |
| GN groups with 8 or more GNs      | 4      | 2  |
| GN groups with 9 or more GNs      | 3      | 2  |
| GN groups with 12 or more GNs     | 2      | 1  |
| GN, ground nest; TNs, tree nests. |        |    |

**Table S9.** Average nest height above the ground in the different survey areas including and excluding ground nests.

| Survey area  | No.<br>total<br>nests | No.<br>TNs | mean (m)<br>[GNs excluded] | SE  | min<br>(m) | max<br>(m) | median<br>(m) | No.<br>GNs | mean (m)<br>[GNs included] | SE  | min<br>(m) | max<br>(m) | median<br>(m) |
|--------------|-----------------------|------------|----------------------------|-----|------------|------------|---------------|------------|----------------------------|-----|------------|------------|---------------|
| Camp Louis   | 719                   | 631        | 9.6                        | 6.8 | 0.6        | 35.0       | 7.0           | 88         | 8.4                        | 7.1 | 0.0        | 35.0       | 6.5           |
| Gangu        | 750                   | 631        | 10.2                       | 5.5 | 0.6        | 40.0       | 8.5           | 119        | 8.6                        | 6.3 | 0.0        | 40.0       | 8.0           |
| Bili South   | 102                   | 95         | 11.9                       | 5.1 | 1.7        | 28.0       | 11.0          | 7          | 11.1                       | 5.8 | 0.0        | 28.0       | 11.0          |
| Zapay        | 124                   | 114        | 11.1                       | 6.1 | 2.5        | 28.0       | 8.0           | 10         | 10.2                       | 6.6 | 0.0        | 28.0       | 8.0           |
| Gbangadi     | 85                    | 82         | 10.9                       | 5.5 | 1.9        | 28.0       | 10.0          | 3          | 10.5                       | 5.8 | 0.0        | 28.0       | 10.0          |
| Nawege-Zaza  | 31                    | 31         | 8.1                        | 3.8 | 2.5        | 18.0       | 8.0           | 0          | 8.1                        | 3.8 | 2.5        | 18.0       | 8.0           |
| Dume         | 18                    | 12         | 11.2                       | 9.4 | 2.0        | 30.0       | 7.5           | 6          | 7.5                        | 9.3 | 0.0        | 30.0       | 5.0           |
| Bambilo      | —                     | —          | —                          | —   | —          | —          | —             | —          | —                          | —   | —          | —          | —             |
| N Uele total | 1,829                 | 1,596      | 10.4                       | 1.7 | 0.6        | 40.0       | 8.0           | 233        | 9.2                        | 1.7 | 0.0        | 40.0       | 8.0           |
| Leguga       | 116                   | 83         | 10.5                       | 6.0 | 4.5        | 30.0       | 8.0           | 33         | 7.5                        | 6.9 | 0.0        | 30.0       | 7.0           |
| Buta         | 39                    | 39         | 15.9                       | 5.5 | 6.5        | 28.0       | 15.0          | 0          | 15.9                       | 5.5 | 6.5        | 28.0       | 15.0          |
| Ngume        | 30                    | 30         | 9.9                        | 2.5 | 4.0        | 15.0       | 10.0          | 0          | 9.9                        | 2.5 | 4.0        | 15.0       | 10.0          |
| Akuma -Yoko  | 37                    | 35         | 13.9                       | 7.3 | 6.5        | 27.0       | 10.0          | 2          | 13.2                       | 7.8 | 0.0        | 27.0       | 10.0          |
| Mbange East  | 91                    | 90         | 9.5                        | 3.8 | 2.1        | 23.0       | 8.8           | 0          | 9.4                        | 3.9 | 0.0        | 23.0       | 8.5           |
| Mbange West  | 67                    | 67         | 11.3                       | 5.5 | 5.0        | 30.0       | 9.5           | 0          | 11.3                       | 5.5 | 5.0        | 30.0       | 9.5           |
| Lingo        | 36                    | 36         | 13.6                       | 6.7 | 6.0        | 30.0       | 11.0          | 0          | 13.6                       | 6.7 | 6.0        | 30.0       | 11.0          |
| Zongia       | 27                    | 24         | 7.9                        | 3.1 | 3.0        | 15.0       | 7.0           | 3          | 7.0                        | 3.8 | 0.0        | 15.0       | 7.0           |
| Difongo      | —                     | —          | —                          | —   | —          | —          | —             | —          | —                          | —   | —          | —          | —             |
| Membulu      | —                     | —          | —                          | —   | —          | —          | —             | —          | —                          | —   | —          | —          | —             |
| Lebo         | 162                   | 158        | 10.3                       | 5.0 | 0.6        | 34.0       | 9.0           | 4          | 10.0                       | 5.2 | 0.0        | 34.0       | 9.0           |
| Bambesa      | 215                   | 183        | 8.0                        | 3.5 | 0.6        | 25.0       | 7.0           | 32         | 6.8                        | 4.3 | 0.0        | 25.0       | 7.0           |
| S Uele total | 820                   | 745        | 11.1                       | 1.6 | 0.6        | 34.0       | 9.3           | 74         | 10.5                       | 1.6 | 0.0        | 34.0       | 9.3           |
| Total        | 2,649                 | 2,341      | 10.8                       | 0.1 | 0.6        | 40.0       | 8.6           | 307        | 9.8                        | 0.1 | 0.0        | 40.0       | 8.6           |

The number of nests differ from other tables and other SMs because we included a subset of nests that had information on nest height.

GNs, ground nests; TNs, tree nests; "—", data not available.



**Table S10.** Number and percentages (in bold) of complex ground nests, flimsy ground nests, and leaf cushions associated with feeding remains, dung, and hair when considering all ages or limited to fresh and recent only.

| Associated chimpanzee evidence | All TNs     | Fresh and recent TNs | All CGNs    | Fresh and recent CGNs | All FGNs    | Fresh and recent FGNs | All LCs     | Fresh and recent LCs |
|--------------------------------|-------------|----------------------|-------------|-----------------------|-------------|-----------------------|-------------|----------------------|
| Feeding remains, dung, hair    | 0           | 0                    | 4           | 4                     | 0           | 0                     | 3           | 3                    |
|                                | <b>0</b>    | <b>0</b>             | <b>1.5</b>  | <b>2.8</b>            | <b>0</b>    | <b>0</b>              | <b>13.6</b> | <b>18.8</b>          |
| Feeding remains, dung          | 1           | 1                    | 1           | 1                     | 1           | 1                     | 2           | 2                    |
|                                | <b>0.1</b>  | <b>0.1</b>           | <b>0.4</b>  | <b>0.7</b>            | <b>9.1</b>  | <b>16.7</b>           | <b>9.1</b>  | <b>12.5</b>          |
| Feeding remains only           | 33          | 22                   | 18          | 9                     | 3           | 2                     | 2           | 2                    |
|                                | <b>2.5</b>  | <b>2.7</b>           | <b>6.9</b>  | <b>6.4</b>            | <b>27.3</b> | <b>33.3</b>           | <b>9.1</b>  | <b>12.5</b>          |
| Hair only                      | 5           | 4                    | 50          | 27                    | 1           | 0                     | 2           | 2                    |
|                                | <b>0.4</b>  | <b>0.5</b>           | <b>19.2</b> | <b>19.2</b>           | <b>9.1</b>  | <b>0</b>              | <b>9.1</b>  | <b>12.5</b>          |
| Dung only                      | 82          | 30                   | 31          | 8                     | 1           | 0                     | 0           | 0                    |
|                                | <b>10.0</b> | <b>2.2</b>           | <b>11.9</b> | <b>5.7</b>            | <b>9.1</b>  | <b>0</b>              | <b>0</b>    | <b>0</b>             |
| Hair and dung                  | 6           | 6                    | 19          | 18                    | 0           | 0                     | 0           | 0                    |
|                                | <b>0.4</b>  | <b>0.7</b>           | <b>7.3</b>  | <b>12.8</b>           | <b>0</b>    | <b>0</b>              | <b>0</b>    | <b>0</b>             |
| Total feeding remains          | 34          | 23                   | 23          | 14                    | 4           | 3                     | 7           | 7                    |
|                                | <b>2.5</b>  | <b>2.8</b>           | <b>8.8</b>  | <b>9.9</b>            | <b>36.4</b> | <b>50.0</b>           | <b>31.8</b> | <b>43.8</b>          |
| Total hair                     | 11          | 10                   | 73          | 49                    | 1           | 0                     | 5           | 5                    |
|                                | <b>0.8</b>  | <b>1.2</b>           | <b>28.0</b> | <b>34.8</b>           | <b>9.1</b>  | <b>0</b>              | <b>22.7</b> | <b>31.2</b>          |
| Total dung                     | 89          | 37                   | 55          | 31                    | 2           | 1                     | 5           | 5                    |
|                                | <b>6.6</b>  | <b>4.5</b>           | <b>21.1</b> | <b>22.0</b>           | <b>18.2</b> | <b>16.7</b>           | <b>22.7</b> | <b>31.2</b>          |
| None                           | 1,273       | 712                  | 157         | 92                    | 5           | 3                     | 13          | 7                    |
|                                | <b>95.3</b> | <b>86.7</b>          | <b>60.2</b> | <b>65.3</b>           | <b>45.5</b> | <b>50.0</b>           | <b>59.1</b> | <b>43.8</b>          |
| Total                          | 1,342       | 821                  | 261         | 141                   | 11          | 6                     | 22          | 16                   |

50% (11/22) of LCs were associated with chimpanzee nests, 9% (2/22) with TNs and 41% (9/22) with GNs. 6.3% of the fresh and recent LCs were associated with TNs, 43.8% with GNs and 50% with both GNs and TNs.

CGNs, complex ground nests; FGNs, flimsy ground nests; LCs, leaf cushions; TNs, tree nests.

**Table S11.** Proportions of ground nests out of total nests in different age categories. Data includes all nests found in our Bili-Uéré surveys in which we categorized their nest age.

| Nest age category                  | GNs        | TNs         | Total nests | % GNs     |
|------------------------------------|------------|-------------|-------------|-----------|
| 1 (fresh)                          | 35         | 347         | 382         | 9         |
| 2 (recent)                         | 68         | 542         | 610         | 11        |
| 3 (retains form)                   | 117        | 603         | 720         | 16        |
| <b>Retains form (1–3)</b>          | <b>220</b> | <b>1492</b> | <b>1712</b> | <b>13</b> |
| 4 (rotted)                         | 66         | 1018        | 1084        | 6         |
| 5 (skeleton)                       | 21         | 117         | 138         | 15        |
| <b>Old (4–5)</b>                   | <b>87</b>  | <b>1135</b> | <b>1222</b> | <b>7</b>  |
| Total nests                        | 307        | 2627        | 2934        | 11        |
| GN, ground nests; TNs, tree nests. |            |             |             |           |

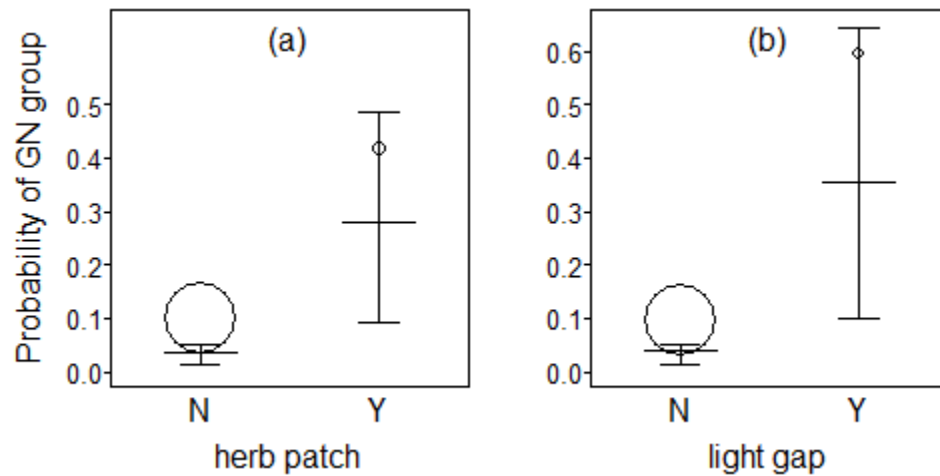

**Figure S4.** Model 1a: Probability of a nest group consisting of ground nests as a function of herb patch (A, p-value < 0.001) and light gap (B, p-value < 0.001). They were both significant. The bars represent the fitted model and its lower and upper confidence limits, with all other predictors being centered. The area of the dots corresponds to the total sample size (herb patch: No = 2,496 - Yes = 93; light gap: No = 2,520 - Yes = 69).

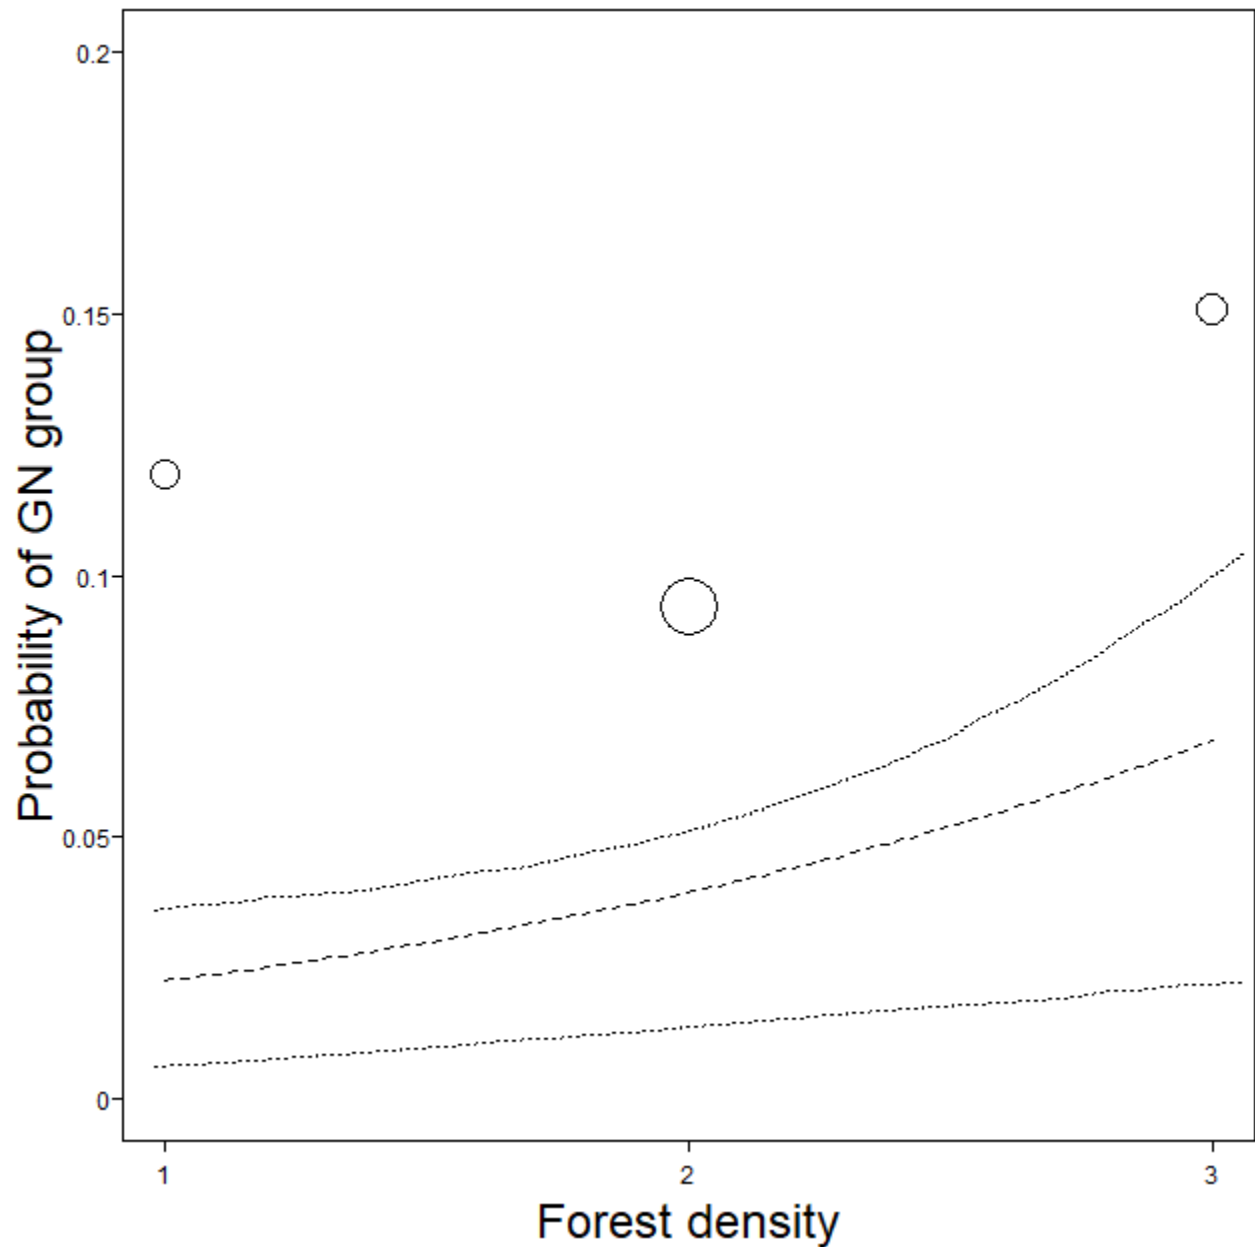

**Figure S5.** Model 1a: Probability of a nest group consisting of ground nests as a function of forest density (significant:  $p$ -value = 0.004). The dashed lines depict the fitted model and the dotted lines its 95% confidence intervals. The area of the dots depicts the sample size (min = 452 and max = 1,619). GN, ground nest.

**Table S12.** Impact of habitat in Models 1a and 2a. See tables 3 and 4 for description of habitat types, and supplementary table S4 for details on the number of nests found in each.

| Habitat type                                | BLUPs<br>Model 1a | BLUPs<br>Model 2a |
|---------------------------------------------|-------------------|-------------------|
| Active field                                | 0.0               | -2.434            |
| Old field / regenerating forest             | 0.0               | 10.529            |
| Secondary forest                            | 0.0               | -1.858            |
| Mixed forest                                | 0.0               | -1.480            |
| Riparian forest                             | 0.0               | 5.309             |
| Swamp forest                                | 0.0               | -1.389            |
| <i>Gilbertiodendron</i> monodominant forest | 0.0               | 1.368             |
| Savanna                                     | 0.0               | -2.761            |

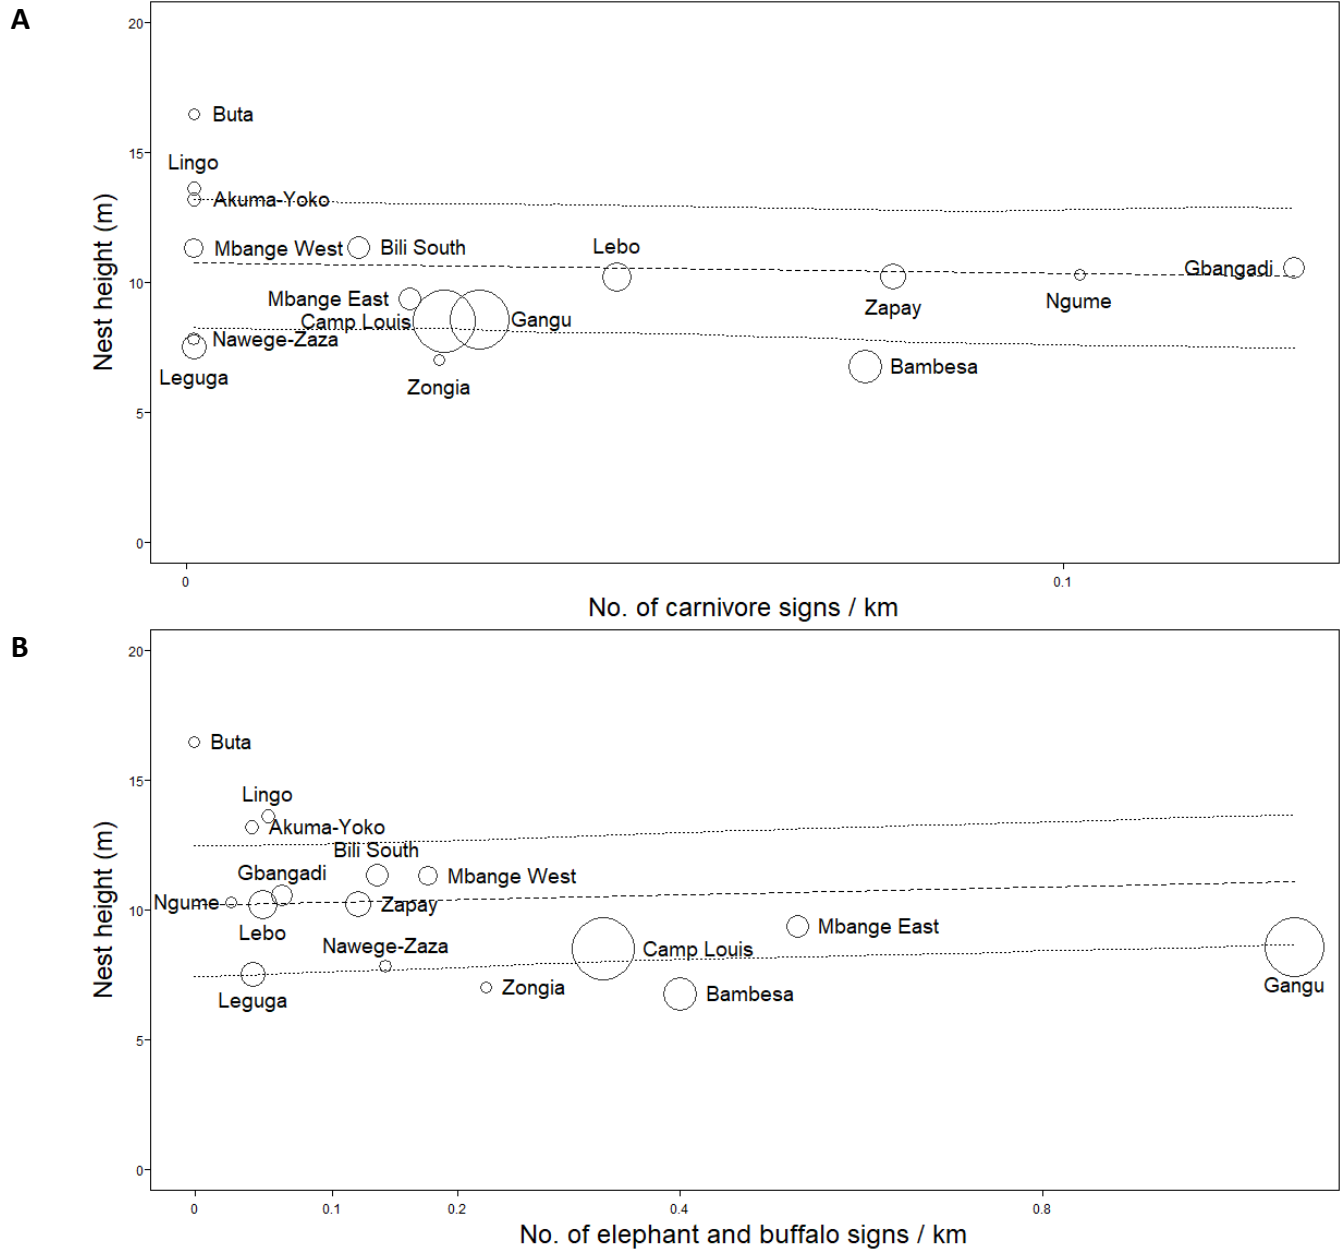

**Figure S6.** Nest height as a function of encounter rates of carnivores (A; not significant:  $p$ -value = 0.686), and elephants and buffalos (B; significant:  $p$ -value = 0.023). The area of the circles represents the number of nests in the 16 survey areas (min = 5, max = 710), and nest height refers to the average nest height per survey area. The dashed lines depict the fitted model (Model 2a) and the dotted lines its upper and lower confidence limits for all other predictors centered to a mean of zero.

**Table S13.** Distance of nests from the nearest road.

| Survey area  | GNs     |           |      |       |       |        | TNs     |           |      |       |       |        |
|--------------|---------|-----------|------|-------|-------|--------|---------|-----------|------|-------|-------|--------|
|              | No. GNs | mean (km) | SE   | Min   | Max   | Median | No. TNs | mean (km) | SE   | Min   | Max   | Median |
| Camp Louis   | 91      | 13.07     | 5.16 | 3.00  | 26.00 | 11.50  | 656     | 12.27     | 6.80 | 0.40  | 28.90 | 11.58  |
| Gangu        | 121     | 34.68     | 3.83 | 27.20 | 41.40 | 33.50  | 826     | 33.57     | 3.68 | 24.00 | 41.80 | 33.58  |
| Bili South   | 7       | 4.56      | 2.12 | 2.50  | 7.00  | 3.40   | 109     | 5.96      | 5.43 | 1.10  | 17.80 | 3.65   |
| Zapay        | 10      | 4.53      | 1.12 | 2.70  | 5.50  | 5.05   | 118     | 3.66      | 1.16 | 1.40  | 5.50  | 3.50   |
| Gbangadi     | 3       | 6.87      | 0.40 | 6.50  | 7.30  | 6.80   | 95      | 6.51      | 0.50 | 5.70  | 7.30  | 6.50   |
| Nawege-Zaza  | 0       | NA        | NA   | NA    | NA    | NA     | 33      | 2.00      | 0.59 | 1.20  | 2.50  | 2.15   |
| Bambilo      | 1       | 2.26      | 0.00 | 2.26  | 2.26  | 2.26   | 33      | 12.65     | 4.52 | 6.67  | 21.29 | 12.96  |
| Dume         | 6       | 2.64      | 2.88 | 0.60  | 4.68  | 2.64   | 20      | 4.62      | 3.87 | 0.31  | 11.22 | 3.35   |
| N Uele total | 239     | 9.80      | –    | 0.60  | 41.40 | –      | 1,890   | 11.10     | –    | 0.31  | 41.80 | –      |
| Leguga       | 33      | 7.80      | 0.91 | 6.20  | 9.00  | 7.95   | 85      | 6.94      | 2.70 | 0.70  | 9.50  | 7.90   |
| Buta         | 0       | NA        | NA   | NA    | NA    | NA     | 39      | 7.11      | 1.95 | 3.70  | 8.90  | 7.70   |
| Ngume        | 0       | NA        | NA   | NA    | NA    | NA     | 32      | 10.02     | 4.36 | 1.30  | 15.10 | 9.35   |
| Akuma -Yoko  | 2       | 5.15      | 1.34 | 4.20  | 6.10  | 5.15   | 35      | 4.17      | 1.91 | 1.40  | 6.70  | 4.40   |
| Mbange East  | 1       | 9.00      | 0.00 | 9.00  | 9.00  | 9.00   | 91      | 9.13      | 3.45 | 4.20  | 14.80 | 8.70   |
| Mbange West  | 0       | NA        | NA   | NA    | NA    | NA     | 70      | 5.03      | 0.97 | 3.30  | 7.10  | 4.90   |
| Lingo        | 0       | NA        | NA   | NA    | NA    | NA     | 40      | 3.57      | 0.91 | 2.10  | 4.50  | 3.95   |
| Zongia       | 3       | 8.70      | 0.00 | 8.70  | 8.70  | 8.70   | 28      | 8.70      | 0.00 | 8.70  | 8.70  | 8.70   |
| Lebo         | 4       | 4.55      | 0.58 | 3.70  | 5.00  | 4.75   | 165     | 3.02      | 1.98 | 0.01  | 6.00  | 3.90   |
| Bambesa      | 34      | 7.70      | 0.72 | 6.40  | 8.50  | 7.95   | 190     | 5.58      | 2.58 | 0.90  | 8.60  | 6.40   |
| S Uele total | 77      | 7.15      | –    | 3.70  | 9.00  | –      | 775     | 6.26      | –    | 0.01  | 15.10 | –      |
| Total        | 316     | 9.45      | –    | 0.60  | 41.40 | –      | 2,765   | 8.68      | –    | 0.01  | 41.80 | –      |

The number of nests differ from other tables and SMs because we included a subset of nests that had information on distance from road.

GNs, ground nests; TNs, tree nests; “NA”, not applicable due to absence of ground nests.

### **Text S1. Were all of the ground nests night nests?**

Usually, the nest sites we found were not fresh and therefore it was difficult to be sure whether or not ground nests had been slept in overnight. Fortunately, there were enough exceptions to allow us to be certain that at least some of the ground nests were night nests. The following are 5 cases where we could be reasonably sure that the ground nests had been slept in overnight and vacated the following morning (excerpted from TH's data books). More information on each nest site can be found in the online data.

NOVEMBER 13, 2004, GANGU FOREST (NEST SITE 100)

On 13 November, 2004, leaving camp before first light, we followed chimpanzee vocalizations to their nest site in the Nambala Swamp. There, at 7:45 am we made contact with several individuals, including an adult male, as they were feeding in a fig tree. Following the contact, we backtracked to their nest site and found four fresh tree nests with dung on the ground beneath them and a large, elaborately-constructed ground nest made of interwoven *Marantochloa congenisa* herbs. The herbs had been bent into a central body (fig. text S1), and the nest was full of hairs. A large amount of dung, weighing 1285 g, was found at the nest. As can be seen in the figure, one dung pile (weighing 869 g) was clearly fresh and had been deposited in the morning. The crisp edges of the hostra rings were visible, and the color was light. Another 416 g of dung present at the site was decayed and reddish-colored, with no discernable hostra rings. This second mass of older dung had probably been deposited the night before, and had already decayed into mush, probably due to the action of dung beetles.

NOVEMBER 16, GANGU FOREST (NEST SITE 102)

We wait until about 11 am, then move north into the Nambala riverbed to look for more nests, where we find another fresh ground nest, not 50 m NW of the one we found 3 days ago. Is this the same male come back to nest in a favorite spot? The nest is a big one, 130 cm × 90 cm, made of *dukpe* leaves. *Dukpe* is another kind of swamp herb, resembling *Megaphrynium* and *gole* (*Megaphrynium* is also growing near the nest). There is lots of dung from this morning or last evening (291 g) and it has been rained on, thus eliminating any shape or hostra rings. That it was



rained on shows that it most likely predated the morning contact and thus was unlikely to be a day nest. We save several long black hairs with roots present for DNA analysis (one hair measured 5.8 cm). We also find feeding remains in the nest: the red shells of *dukpe* fruits. There is also a full, rather rotten fig on the ground beside the nest. We are far enough from the fig tree that the fruit must have been transported by hand. Did the chimp bring the fruit here in the evening and then decide against eating it?

OCTOBER 12, 2006, GANGU FOREST (NEST SITE 279)

Turning off the transect just a few m, at 12:55 Ligada spots a beautiful GROUND NEST SITE (N178), in age cat 2 forest, from TODAY! Vacated this morning! Which means we just missed these chimps when we passed by the night before!). Nest A is the ground nest, 73 cm × 93 cm, quite beautiful and complex. There are 4 piles of dung around the south rim of the ground nest, all rained on, so the dung is all from the morning or last evening before the rain. The dung is full of *gelo* seeds. Several hairs are collected from this nest. 1.5 m north northeast from the edge of the ground nest is a tree nest from the same day (today), with dung beneath, also full of *gelo*. Its estimated elevation is 6 m. The next day, we will collect hair samples from the tree nest as well.

DECEMBER 30, 2006, ZAPAY FOREST (NEST SITE 366)

After listening to chimpanzees pant-hoot and tree-drum all night at close range (at least one adult male was in the sleeping party), we left camp before dawn at 5:40 hours. We arrived at the chimpanzees' freshly-vacated nest site at 6:45 hours, having last heard the chimpanzees pant-hoot from there prior to sunrise at 5:59 hours. We found two fresh elaborate bowl-shaped ground nests next to the stream, full of shed hairs and constructed from *Marantaceae* and saplings (see fig. 1B). We also found three fresh tree nests across the stream within 50 m, along with older tree and ground nests. Beside one of the two fresh ground nests was dung from the previous evening, only slightly decayed. Beside the second nest was fresh dung from that morning with crisp hostra rings. Clearly this site had been slept in at night and vacated minutes before. While controlling

the nest site we heard an adult male chimpanzee pant-hoot and tree-drum three times from within 100 m of the nest site. He had not moved off far.

MARCH 17, 2008, LEGUGA FOREST (NEST SITE 555)

Following chimpanzee vocalizations heard from camp at 7:29, we encounter chimpanzees: 3 feeding in a fig tree and others on the ground at a large termite pounding 'workshop' on the ground. Following our contact, we backtrack to the nest site, passing many fresh pounded termite mounds, dung, and fruit feeding remains. <100 m along the trail we find a fresh nest site of 6 tree nests and 2 complex ground nests; the fresh dung means the nest was vacated this morning. One fresh ground nest has a large *akamba* (*Desplatsia dewevrai*) fruit eaten by the chimpanzee touching the northwest corner of the nest). The nest is in a cat 3 vine tangle. The other ground nest has dung from yesterday 25 cm N of the nest, with what look like hostra rings. The dung is still crisp. Several of the associated tree nests also have fresh dung beneath them. The chimpanzees clearly slept at this site the night before and then visited the fruit tree (<100 m away) where we had contacted them.

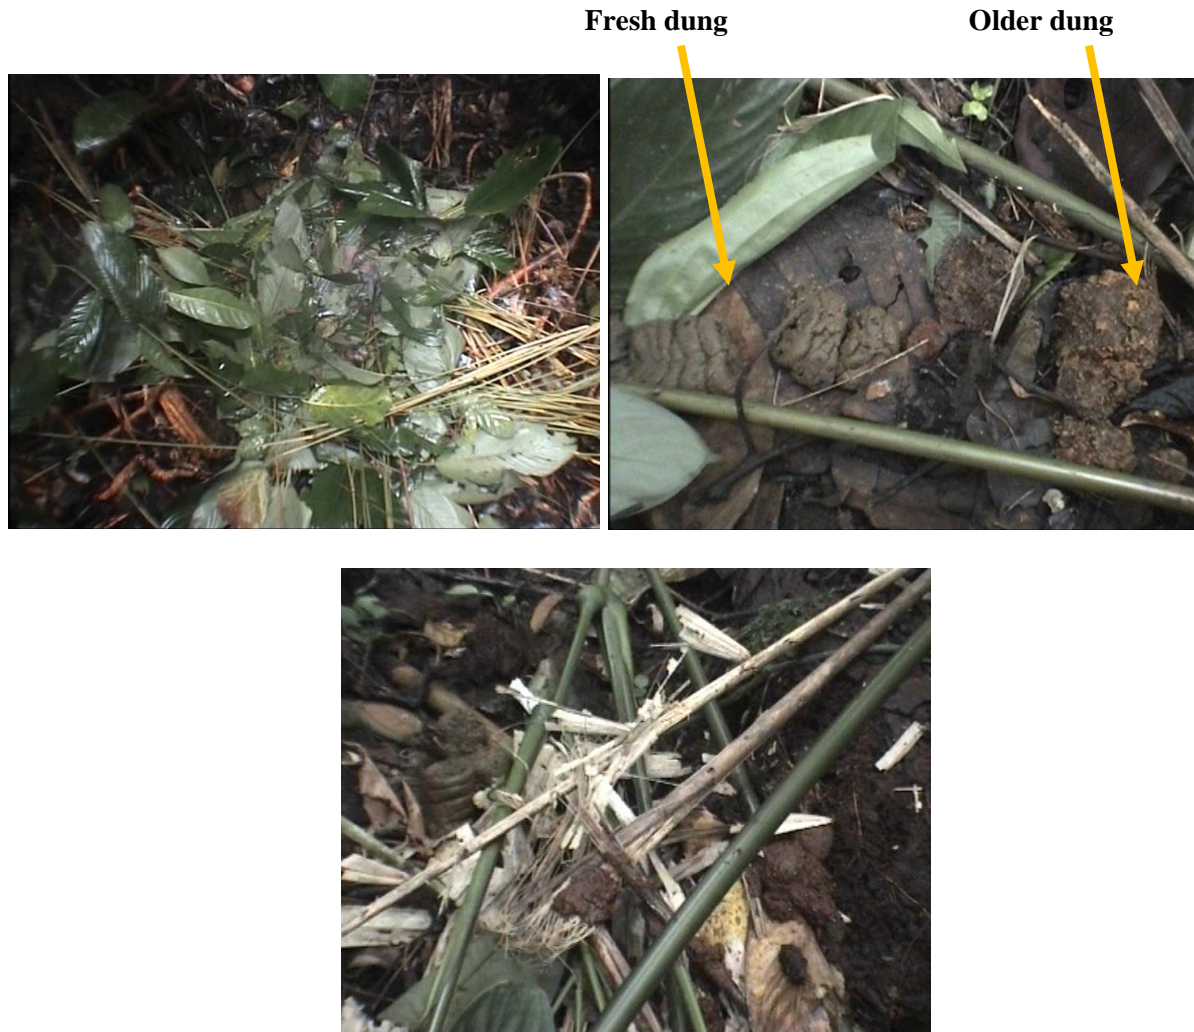

**Figure text S1.** Nest site with clear signs of having been slept in overnight. The arrows indicate an old (to the right) and fresh dung (to the left).

**Video S1.** Online video clips showing uninjured Bili-Gangu chimpanzees.

[https://www.youtube.com/watch?v=\\_Zi-1oeGhh4&t=1s](https://www.youtube.com/watch?v=_Zi-1oeGhh4&t=1s)

<https://www.youtube.com/watch?v=X2H5s7vNgms&t=9s>

<https://www.youtube.com/watch?v=z8A30gacZSg&t=3s>

<https://www.youtube.com/watch?v=kyp2P4ywHF0>
